# Supplementary material for: Protein Expression Profile and Transcriptome Characterization of Penicillium expansum Induced by Meyerozyma guilliermondii
Source: Hindawi journal article supplement (doi:10.1155/2020/8056767), 2020-02-11
Supplement: f1 [file 8056767.f1.docx]

| Gene description | Revers primer (5'to 3') |
| --- | --- |
| *Phosphoesterase* | F: 5’-CCAAGGGTCACGTTGAGGGC-3’  R: 5’-CGGAGGTAGCAGAGTAGGGAGAAGA-3’ |
| *Polyketide synthase, enoylreductase* | F: 5’-CCGCTACTCAGGCGTTTGC-3'  R: 5’-ACTCCAGCTCCCTCGTGTCC-3’ |
| *ATPase, F0/V0 complex, subunit C* | F: 5’-TGACGCACTCCCGAATACA-3’  R: 5’-GCCTTTGCCTGGACACCT-3’ |
| *ATPase, F1/A1 complex, alpha subunit, N-terminal* | F: 5'-ACGGTGCTGGTTCCTTGACTG-3'  R: 5'-GCGGGACGGATACCCTTGT-3' |
| *HEAT, type 2* | F: 5'-TGAGAATGCGACTCCATACCTG-3'  R: 5'-TCATTTGCCGTCACTTCTTCG-3' |
| *Actin* | F: 5’-AGCGGTGACAAGTACGTTCC-3’  R: 5’-ACCCTTGGCCCAGTTGTTAC-3’ |

Supplementary Table 1: primer design of basal metabolism and response regulation genes in *P. expansum*
